# Supplementary material
Source: MDPI journal article supplement (https://www.mdpi.com/1424-8247/14/5/459)
Supplement: s1 [file s1]

## Supplementary Materials:

# Construction of recombinant human GM-CSF and GM-CSF-ApoA-I fusion protein and assessment of their biological activity.

Mariya Pykhtina<sup>1</sup>, Svetlana Miroshnichenko<sup>1</sup>, Vladimir Romanov<sup>1</sup>, Antonina Grazhdantseva<sup>2</sup>, Galina Kochneva<sup>2</sup> and Anatoly Beklemishev<sup>1,\*</sup>

- <sup>1</sup> Institute of Biochemistry of Federal Research Center of Fundamental and Translational Medicine (FRC FTM), Novosibirsk, 2 Timakova Street, 630630 Novosibirsk, Russia; M.P.: [Pykhtina\\_maria@mail.ru](mailto:Pykhtina_maria@mail.ru); S.M.: [svmiro@yandex.ru](mailto:svmiro@yandex.ru); V.R.: [vprom@mail.ru](mailto:vprom@mail.ru);  
<sup>2</sup> Federal Budgetary Research Institution State Research Center of Virology and Biotechnology "Vector", Koltsovo, Novosibirsk region, Russia  
A.G.: [gaa@vector.nsc.ru](mailto:gaa@vector.nsc.ru); G.K.: [g.v.kochneva@yandex.ru](mailto:g.v.kochneva@yandex.ru)  
\* Correspondence: [beklem@niibch.ru](mailto:beklem@niibch.ru) (A.B.)

## Supplementary Materials:

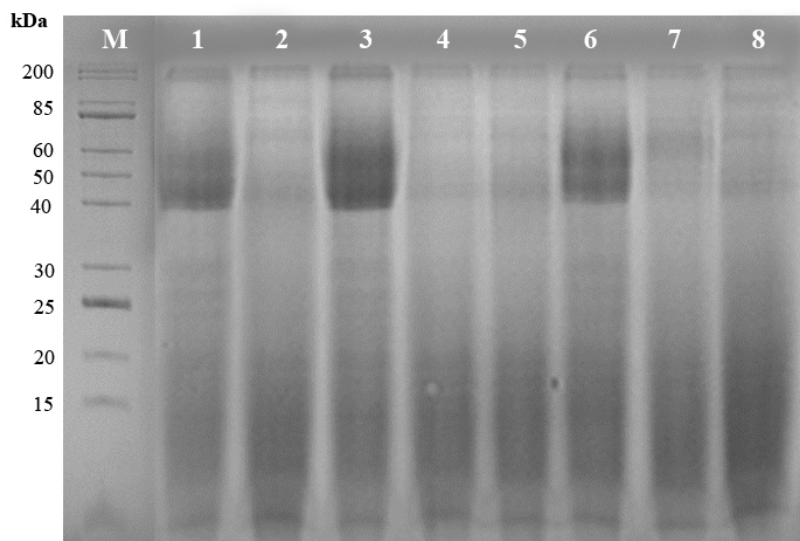

**Figure S1.** SDS-PAGE analysis of TCA-precipitated proteins secreted by *P. pastoris* clones into culture medium after 96 h of induction. Lane M contains a standard protein molecular weight marker (Sib Enzyme). Lanes 1–8 contains TCA-precipitated proteins of analyzed clones.

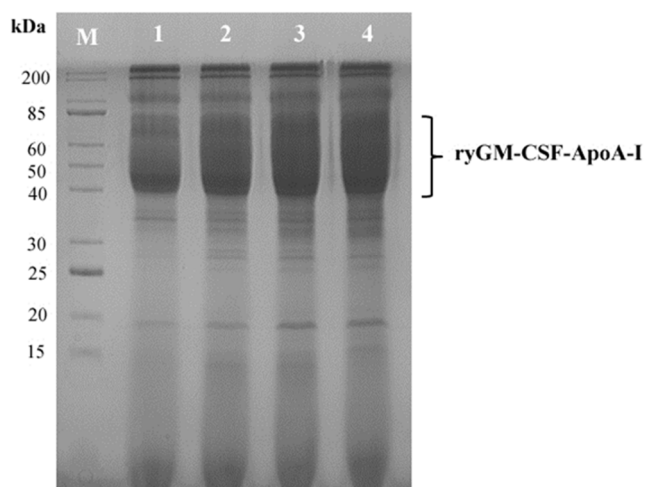

**Figure S2.** SDS-PAGE analysis of ryG-CMSF-ApoA-I production on the orbital shaker. Lane M: protein molecular weight marker (Sib Enzyme); lanes 1–4 contains 24, 48, 72, 96 h by methanol induction. Samples of culture supernatants that were 15-fold concentrated with TCA.

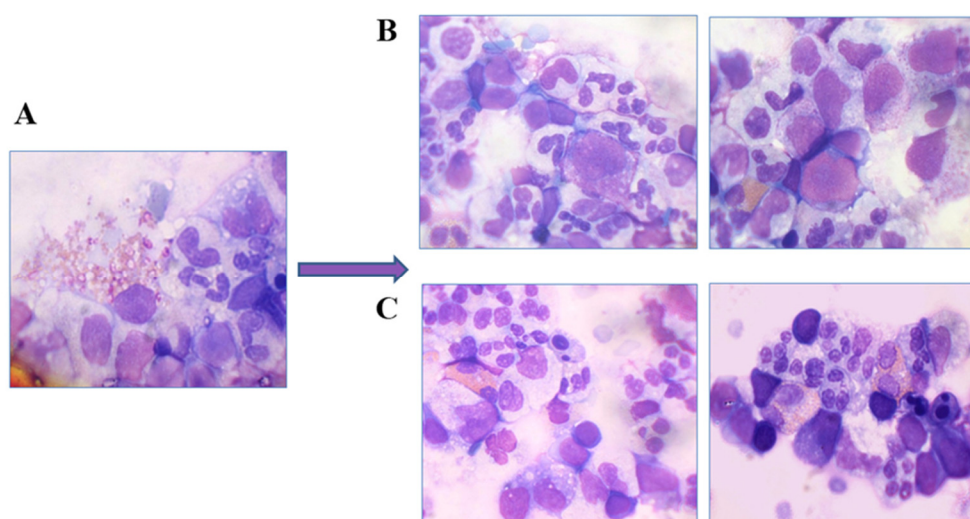

**Figure S3.** Human BMCs treated with ryGM-CSF-ApoA-I (B) and ryGM-CSF (C) versus control (A) for 48 h of incubation. The control is observed: Immature hyposegmented neutrophils, increased apoptosis, phagocytosis, increased number of monocytes. Samples treated with ryGM-CSF-ApoA-I - mature neutrophils, viable intact stroma, blast cells. Samples treated with ryGM-CSF - mature neutrophils with less condensed chromatin, monocytes, macrophages, eosinophils and erythroid blasts, apoptosis.
